# Supplementary material
Source: publisher figshare collection journal article supplement (https://geolsoc.figshare.com/ndownloader/files/6989825)
Supplement: Supplementary file 1 [file 6989825]

## Sheet: Korte&Ullmann_MT
Sample no.	Sample description	Sample type	87Sr/86Sr	Age (Ma)	Formation/Locality/Biozone	Region/State	Country	Stage in reference	International Stage	Source
				GT2012
IZ153a		whole rock carbonate	0.708106	247.131	Zal		Iran	Spathian	Olenekian	Sedlacek et al., 2014
Palaz 38		conodonts	0.708132	247.275	Chiosella gondolelloides, Pietra dei Saracini	Sicily	Italy	Olenekian	Olenekian	Korte et al., 2003
Palaz 39		conodonts	0.708148	247.333	Chiosella gondolelloides, Pietra dei Saracini	Sicily	Italy	Olenekian	Olenekian	Korte et al., 2003
IZ145		whole rock carbonate	0.708134	247.385	Zal		Iran	Spathian	Olenekian	Sedlacek et al., 2014
Palaz 40		conodonts	0.708135	247.419	Chiosella gondolelloides, Pietra dei Saracini	Sicily	Italy	Olenekian	Olenekian	Korte et al., 2003
Palaz 41		conodonts	0.708227	247.55	Triassospathodus sosioensis, Pietra dei Saracini	Sicily	Italy	Olenekian	Olenekian	Korte et al., 2003
Palaz 20		conodonts	0.708174	247.583	Triassospathodus sosioensis, Pietra dei Saracini	Sicily	Italy	Olenekian	Olenekian	Korte et al., 2003
Palaz 19		conodonts	0.708186	247.695	Triassospathodus sosioensis, Pietra dei Saracini	Sicily	Italy	Olenekian	Olenekian	Korte et al., 2003
Palaz 18		conodonts	0.70818	247.779	Triassospathodus sosioensis, Pietra dei Saracini	Sicily	Italy	Olenekian	Olenekian	Korte et al., 2003
Palaz 43		conodonts	0.708194	247.844	Triassospathodus sosioensis, Pietra dei Saracini	Sicily	Italy	Olenekian	Olenekian	Korte et al., 2003
Palaz 17		conodonts	0.708162	247.921	Triassospathodus sosioensis, Pietra dei Saracini	Sicily	Italy	Olenekian	Olenekian	Korte et al., 2003
IZ132		whole rock carbonate	0.708016	247.979	Zal		Iran	Spathian	Olenekian	Sedlacek et al., 2014
Palaz 44		conodonts	0.708168	248.01	Triassospathodus sosioensis, Pietra dei Saracini	Sicily	Italy	Olenekian	Olenekian	Korte et al., 2003
IZ131		whole rock carbonate	0.707988	248.041	Zal		Iran	Spathian	Olenekian	Sedlacek et al., 2014
IZ122		whole rock carbonate	0.707884	248.491	Zal		Iran	Spathian	Olenekian	Sedlacek et al., 2014
IZ120		whole rock carbonate	0.707877	248.568	Zal		Iran	Smithian	Olenekian	Sedlacek et al., 2014
IZ113		whole rock carbonate	0.707868	248.94	Zal		Iran	Smithian	Olenekian	Sedlacek et al., 2014
IZ111		whole rock carbonate	0.70773	249.088	Zal		Iran	Smithian	Olenekian	Sedlacek et al., 2014
IZ108		whole rock carbonate	0.707713	249.223	Zal		Iran	Smithian	Olenekian	Sedlacek et al., 2014
CS-4		conodont	0.707928	249.433	Crittenden Springs	Nevada	USA	Smithian	Olenekian	Martin and Macdougall, 1995
IZ104		whole rock carbonate	0.707687	249.467	Zal		Iran	Smithian	Olenekian	Sedlacek et al., 2014
IZ100		whole rock carbonate	0.707743	249.626	Zal		Iran	Smithian	Olenekian	Sedlacek et al., 2014
IZ99		whole rock carbonate	0.7076	249.642	Zal		Iran	Smithian	Olenekian	Sedlacek et al., 2014
NN-7		conodont	0.708191	249.7	Nammal Nala	Salt Range	Pakistan	Smithian	Olenekian	Martin and Macdougall, 1995
IZ98		whole rock carbonate	0.707668	249.75	Zal		Iran	Smithian	Olenekian	Sedlacek et al., 2014
CS-3		conodont	0.707855	249.833	Crittenden Springs	Nevada	USA	Smithian	Olenekian	Martin and Macdougall, 1995
IZ96		whole rock carbonate	0.707596	249.87	Zal		Iran	Dienerian	Olenekian	Sedlacek et al., 2014
Uomo 23		conodonts	0.707884	249.889	N. waageni - S. meeki, L. Olenekian, Uomo	Dolomites	Italy	Olenekian	Olenekian	Korte et al., 2003
IZ95		whole rock carbonate	0.707591	249.898	Zal		Iran	Dienerian	Olenekian	Sedlacek et al., 2014
IS92		whole rock carbonate	0.707554	249.987	Zal		Iran	Dienerian	Olenekian	Sedlacek et al., 2014
CS-2		conodont	0.707873	250	Crittenden Springs	Nevada	USA	Smithian	Olenekian	Martin and Macdougall, 1995
IS90		whole rock carbonate	0.707611	250.014	Zal		Iran	Dienerian	Olenekian	Sedlacek et al., 2014
IS86		whole rock carbonate	0.707523	250.019	Zal		Iran	Dienerian	Induan	Sedlacek et al., 2014
IS84		whole rock carbonate	0.70753	250.029	Zal		Iran	Dienerian	Induan	Sedlacek et al., 2014
IS83		whole rock carbonate	0.707496	250.034	Zal		Iran	Dienerian	Induan	Sedlacek et al., 2014
IS82		whole rock carbonate	0.70752	250.038	Zal		Iran	Dienerian	Induan	Sedlacek et al., 2014
IS76		whole rock carbonate	0.707479	250.076	Zal		Iran	Dienerian	Induan	Sedlacek et al., 2014
IS72		whole rock carbonate	0.707509	250.093	Zal		Iran	Dienerian	Induan	Sedlacek et al., 2014
Aba 95		conodont	0.707534	250.1	dieneri, Abadeh		Iran		Induan	Korte et al., 2004
IS69		whole rock carbonate	0.707495	250.109	Zal		Iran	Dienerian	Induan	Sedlacek et al., 2014
IS67		whole rock carbonate	0.707474	250.121	Zal		Iran	Dienerian	Induan	Sedlacek et al., 2014
NN-6		conodont	0.708365	250.132	Nammal Nala	Salt Range	Pakistan	Dienerian	Induan	Martin and Macdougall, 1995
IS65		whole rock carbonate	0.70749	250.135	Zal		Iran	Dienerian	Induan	Sedlacek et al., 2014
IS64		whole rock carbonate	0.707507	250.137	Zal		Iran	Dienerian	Induan	Sedlacek et al., 2014
IS63		whole rock carbonate	0.707519	250.138	Zal		Iran	Dienerian	Induan	Sedlacek et al., 2014
IS62		whole rock carbonate	0.707504	250.141	Zal		Iran	Dienerian	Induan	Sedlacek et al., 2014
IS61		whole rock carbonate	0.707507	250.148	Zal		Iran	Dienerian	Induan	Sedlacek et al., 2014
IZ60		whole rock carbonate	0.707555	250.151	Zal		Iran	Dienerian	Induan	Sedlacek et al., 2014
IZ47		whole rock carbonate	0.707465	250.151	Zal		Iran	Dienerian	Induan	Sedlacek et al., 2014
IZ44		whole rock carbonate	0.707545	250.169	Zal		Iran	Dienerian	Induan	Sedlacek et al., 2014
IZ43		whole rock carbonate	0.707473	250.169	Zal		Iran	Dienerian	Induan	Sedlacek et al., 2014
IZ39		whole rock carbonate	0.707433	250.233	Zal		Iran	Dienerian	Induan	Sedlacek et al., 2014
NN-5		conodont	0.708166	250.276	Nammal Nala	Salt Range	Pakistan	Dienerian	Induan	Martin and Macdougall, 1995
IZ35		whole rock carbonate	0.707403	250.321	Zal		Iran	Dienerian	Induan	Sedlacek et al., 2014
IZ34		whole rock carbonate	0.707457	250.345	Zal		Iran	Dienerian	Induan	Sedlacek et al., 2014
Palaz 14		conodonts	0.707687	250.383	Neospathodus dieneri, Gandanian, Pietra dei Saracini	Sicily	Italy	Brahmanian	Induan	Korte et al., 2003
IZ32		whole rock carbonate	0.707485	250.392	Zal		Iran	Dienerian	Induan	Sedlacek et al., 2014
Palaz 13		conodonts	0.707486	250.472	Neospathodus dieneri, Gandanian, Pietra dei Saracini	Sicily	Italy	Brahmanian	Induan	Korte et al., 2003
CD-7		conodont	0.707724	250.516	Chhidru Nala	Salt Range	Pakistan	Dienerian	Induan	Martin and Macdougall, 1995
IZ29		whole rock carbonate	0.707453	250.623	Zal		Iran	Dienerian	Induan	Sedlacek et al., 2014
IZ28		whole rock carbonate	0.707402	250.659	Zal		Iran	Dienerian	Induan	Sedlacek et al., 2014
IZ27		whole rock carbonate	0.707392	250.683	Zal		Iran	Dienerian	Induan	Sedlacek et al., 2014
IZ26		whole rock carbonate	0.707364	250.706	Zal		Iran	Dienerian	Induan	Sedlacek et al., 2014
IZ25		whole rock carbonate	0.707372	250.73	Zal		Iran	Dienerian	Induan	Sedlacek et al., 2014
NN-3		conodont	0.708185	250.756	Nammal Nala	Salt Range	Pakistan	Dienerian	Induan	Martin and Macdougall, 1995
IZ24		whole rock carbonate	0.707407	250.776	Zal		Iran	Dienerian	Induan	Sedlacek et al., 2014
Palaz 11		conodonts	0.707471	250.807	Neospathodus dieneri, Gandanian, Pietra dei Saracini	Sicily	Italy	Brahmanian	Induan	Korte et al., 2003
Aba 93		conodont	0.707398	250.85	dieneri, Abadeh		Iran		Induan	Korte et al., 2004
IZ21		whole rock carbonate	0.707419	250.87	Zal		Iran	Dienerian	Induan	Sedlacek et al., 2014
NN-2		conodont	0.707883	250.9	Nammal Nala	Salt Range	Pakistan	Dienerian	Induan	Martin and Macdougall, 1995
IZ20		whole rock carbonate	0.7076	250.95	Zal		Iran	Griesbachian	Induan	Sedlacek et al., 2014
Aba 90		conodont	0.7074	251	postparvus, Abadeh		Iran		Induan	Korte et al., 2004
IZ18		whole rock carbonate	0.707271	251.11	Zal		Iran	Griesbachian	Induan	Sedlacek et al., 2014
CW-4		conodont	0.707614	251.184	Chatuwala Nala	Salt Range	Pakistan	Griesbachian	Induan	Martin and Macdougall, 1995
NN-1		conodont	0.707844	251.184	Nammal Nala	Salt Range	Pakistan	Griesbachian	Induan	Martin and Macdougall, 1995
CS-1		conodont	0.707645	251.387	Crittenden Springs	Nevada	USA	Griesbachian	Induan	Martin and Macdougall, 1995
IZ14		whole rock carbonate	0.707651	251.413	Zal		Iran	Griesbachian	Induan	Sedlacek et al., 2014
IZ11		whole rock carbonate	0.707206	251.481	Zal		Iran	Griesbachian	Induan	Sedlacek et al., 2014
IZ10		whole rock carbonate	0.707159	251.504	Zal		Iran	Griesbachian	Induan	Sedlacek et al., 2014
IZ8		whole rock carbonate	0.707223	251.55	Zal		Iran	Griesbachian	Induan	Sedlacek et al., 2014
Palaz 10		conodonts	0.707427	251.646	Hindeodus postparvus, Gangetianian, Pietra dei Saracini	Sicily	Italy	Brahmanian	Induan	Korte et al., 2003
Palaz 9		conodonts	0.707493	251.846	Isarcicella isarcica, Gangetianian, Pietra dei Saracini	Sicily	Italy	Brahmanian	Induan	Korte et al., 2003
Aba 85		conodonts	0.707278	251.846	Isarcicella isarcica, Gangetianian, Abadeh		Iran	Brahmanian	Induan	Korte et al., 2003
Palaz 8		conodonts	0.707358	251.914	Isarcicella isarcica, Gangetianian, Pietra dei Saracini	Sicily	Italy	Brahmanian	Induan	Korte et al., 2003
IZ6		whole rock carbonate	0.707226	251.917	Zal		Iran	Griesbachian	Induan	Sedlacek et al., 2014
CW-3		conodont	0.707296	251.997	Chatuwala Nala	Salt Range	Pakistan	Griesbachian	Induan	Martin and Macdougall, 1995
Aba 76		conodont	0.707274	252	isarcica, Abadeh		Iran		Induan	Korte et al., 2004
Palaz 7		conodonts	0.707362	252.018	Isarcicella isarcica, Gangetianian, Pietra dei Saracini	Sicily	Italy	Brahmanian	Induan	Korte et al., 2003
Palaz 6		conodonts	0.707438	252.127	Hindeodus parvus, Gangetianian, Pietra dei Saracini	Sicily	Italy	Brahmanian	Induan	Korte et al., 2003
IZ4		whole rock carbonate	0.707218	252.363	Zal		Iran	Changhsingian	Changhsingian	Sedlacek et al., 2014
Aba 60		conodont	0.707227	252.4	iranica, Abadeh		Iran		Changhsingian	Korte et al., 2004
12282	packstone	whole rock carbonate	0.707088	252.5	Changxing Fm.		China	Changhsingian	Changhsingian	Denison et al., 1994
12283	packstone	whole rock carbonate	0.707038	252.5	Changxing Fm.		China	Changhsingian	Changhsingian	Denison et al., 1994
IZ3		whole rock carbonate	0.707172	252.555	Zal		Iran	Changhsingian	Changhsingian	Sedlacek et al., 2014
J V-6	brachiopod	brachiopod (doubtful)	0.707054	252.615	Clarkina iranica, Jolfa		Iran	Dorashamian (Changx.)	Changhsingian	Korte et al., 2006
CW-2		conodont	0.707491	252.68	Chatuwala Nala	Salt Range	Pakistan	Changhsingian	Changhsingian	Martin and Macdougall, 1995
ch 70	brachiopod	brachiopod (doubtful)	0.70722	252.699	Meishan D	Yangtze Platform	China		Changhsingian	Korte et al., 2006
ch 45	brachiopod	brachiopod (doubtful)	0.707122	252.699	Clarkina zhangi, Meishan D	Yangtze Platform	China	Changxingian	Changhsingian	Korte et al., 2006
ch 84	brachiopod	brachiopod (doubtful)	0.707067	252.702	Zhongliang (Chongquing)	Sichuan	China		Changhsingian	Korte et al., 2006
ch 83	brachiopod	brachiopod (doubtful)	0.707029	252.71	Zhongliang (Chongquing)	Sichuan	China		Changhsingian	Korte et al., 2006
IZ2		whole rock carbonate	0.707105	252.748	Zal		Iran	Changhsingian	Changhsingian	Sedlacek et al., 2014
KA-5		conodont	0.707457	252.76	Kathwai	Salt Range	Pakistan	Changhsingian	Changhsingian	Martin and Macdougall, 1995
ch 71	brachiopod	brachiopod (doubtful)	0.707174	252.79	Meishan D	Yangtze Platform	China		Changhsingian	Korte et al., 2006
ch 72	brachiopod	brachiopod (doubtful)	0.707165	252.79	Meishan D	Yangtze Platform	China		Changhsingian	Korte et al., 2006
Aba 51		conodont	0.707233	252.8	changxingensis-deflecta s.l., Abadeh		Iran		Changhsingian	Korte et al., 2004
ch 73	brachiopod	brachiopod (doubtful)	0.707112	252.804	Meishan D	Yangtze Platform	China		Changhsingian	Korte et al., 2006
ch 69	brachiopod	brachiopod (doubtful)	0.707102	252.835	Meishan D	Yangtze Platform	China		Changhsingian	Korte et al., 2006
CD-6		conodont	0.707415	252.84	Chhidru Nala	Salt Range	Pakistan	Changhsingian	Changhsingian	Martin and Macdougall, 1995
KA-4		conodont	0.707575	252.84	Kathwai	Salt Range	Pakistan	Changhsingian	Changhsingian	Martin and Macdougall, 1995
CW-1		conodont	0.707428	252.84	Chatuwala Nala	Salt Range	Pakistan	Changhsingian	Changhsingian	Martin and Macdougall, 1995
ch 46	brachiopod	brachiopod (doubtful)	0.707117	252.849	C. changxingensis - C. deflecta s.l., Meishan D	Yangtze Platform	China	Changxingian	Changhsingian	Korte et al., 2006
ch 44	brachiopod	brachiopod (doubtful)	0.707228	252.859	C. changxingensis - C. deflecta s.l., Meishan D	Yangtze Platform	China	Changxingian	Changhsingian	Korte et al., 2006
ch 57	brachiopod	brachiopod	0.707131	252.884	C. changxingensis - C. deflecta s.l., Meishan D	Yangtze Platform	China	Changxingian	Changhsingian	Korte et al., 2006
IZ1		whole rock carbonate	0.707078	252.941	Zal		Iran	Changhsingian	Changhsingian	Sedlacek et al., 2014
12288	packstone	whole rock carbonate	0.706968	253	Changxing Fm.		China	Changhsingian	Changhsingian	Denison et al., 1994
KA-3		conodont	0.707446	253	Kathwai	Salt Range	Pakistan	Changhsingian	Changhsingian	Martin and Macdougall, 1995
ch 49	brachiopod	brachiopod	0.707059	253.082	C. changxingensis - C. deflecta s.l., Meishan D	Yangtze Platform	China	Changxingian	Changhsingian	Korte et al., 2006
ch 50	brachiopod	brachiopod (doubtful)	0.707058	253.082	C. changxingensis - C. deflecta s.l., Meishan D	Yangtze Platform	China	Changxingian	Changhsingian	Korte et al., 2006
ch 68	brachiopod	brachiopod (doubtful)	0.707084	253.098	Meishan D	Yangtze Platform	China		Changhsingian	Korte et al., 2006
J 88	brachiopod	brachiopod	0.707146	253.1	C. changxingensis - C. deflecta s.l., Jolfa		Iran	Dorashamian (Changx.)	Changhsingian	Korte et al., 2006
KA-2		conodont	0.707556	253.16	Kathwai	Salt Range	Pakistan	Changhsingian	Changhsingian	Martin and Macdougall, 1995
KA-1		conodont	0.707487	253.24	Kathwai	Salt Range	Pakistan	Changhsingian	Changhsingian	Martin and Macdougall, 1995
Aba 41		conodont	0.707226	253.3	subcarinata, Abadeh		Iran		Changhsingian	Korte et al., 2004
ch 51	brachiopod	brachiopod (doubtful)	0.707133	253.318	C. changxingensis - C. deflecta s.l., Meishan D	Yangtze Platform	China	Changxingian	Changhsingian	Korte et al., 2006
J 81-A	brachiopod	brachiopod	0.707058	253.5	C. changxingensis - C. deflecta s.l., Jolfa		Iran	Dorashamian (Changx.)	Changhsingian	Korte et al., 2006
12295	packstone	whole rock carbonate	0.706928	253.5	Changxing Fm.		China	Changhsingian	Changhsingian	Denison et al., 1994
CD-5		conodont	0.70731	253.56	Chhidru Nala	Salt Range	Pakistan	Changhsingian	Changhsingian	Martin and Macdougall, 1995
ch 52	brachiopod	brachiopod	0.707068	253.703	Clarkina subcarinata s.l., Meishan D	Yangtze Platform	China		Changhsingian	Korte et al., 2006
ch 67	brachiopod	brachiopod (doubtful)	0.707025	253.703	Clarkina subcarinata s.l., Meishan D	Yangtze Platform	China		Changhsingian	Korte et al., 2006
Aba 45		conodonts	0.707215	253.92	Clarkina subcarinata, Abadeh		Iran	Dorashamian	Changhsingian	Korte et al., 2003
CD-4		conodont	0.707678	254.12	Chhidru Nala	Salt Range	Pakistan	Changhsingian	Changhsingian	Martin and Macdougall, 1995
KL-10		conodont	0.707228	254.76	Kotla Lodlian	Khisor Range	Pakistan	Wuchiapingian	Wuchiapingian	Martin and Macdougall, 1995
KL-9		conodont	0.707174	255.544	Kotla Lodlian	Khisor Range	Pakistan	Wuchiapingian	Wuchiapingian	Martin and Macdougall, 1995
Aba 32		conodonts	0.707121	255.656	Clarkina orientalis, Abadeh		Iran	Dzhulfian	Wuchiapingian	Korte et al., 2003
Aba 26		conodont	0.7071	255.7	trancaucasica, Abadeh		Iran		Wuchiapingian	Korte et al., 2004
HB 11 1		brachiopod	0.707151	255.727	U5c=APP5005/6, Cherrabun Mbr.		Australia		Wuchiapingian	Morante, 1996
HB 11 2		brachiopod	0.707141	255.727	U5c=APP5005/6, Cherrabun Mbr.		Australia		Wuchiapingian	Morante, 1996
CD-3		conodont	0.707387	255.992	Chhidru Nala	Salt Range	Pakistan	Wuchiapingian	Wuchiapingian	Martin and Macdougall, 1995
J B-10	brachiopod	brachiopod	0.706953	256.236	Clarkina leveni, Jolfa		Iran	Dzhulfian	Wuchiapingian	Korte et al., 2006
J B-9	brachiopod	brachiopod (doubtful)	0.706998	256.338	Clarkina leveni, Jolfa		Iran	Dzhulfian	Wuchiapingian	Korte et al., 2006
S 19 514,25		brachiopod	0.706881	256.542	U5b=APP5004, top Peawaddy		Australia		Wuchiapingian	Morante, 1996
UQ L 2421		brachiopod	0.706941	256.542	U5c=APP5004, top Peawaddy		Australia		Wuchiapingian	Morante, 1996
KL-8		conodont	0.707105	256.664	Kotla Lodlian	Khisor Range	Pakistan	Wuchiapingian	Wuchiapingian	Martin and Macdougall, 1995
J 37	brachiopod	brachiopod	0.707014	256.759	Clarkina leveni, Jolfa		Iran	Dzhulfian	Wuchiapingian	Korte et al., 2006
8427-1	Permophricodothyris ovata	brachiopod (doubtful)	0.706808	256.76	Lower Julfa, Kuh-e-Ali Bashi		Iran	Dzhulfian	Wuchiapingian	Denison et al., 1994
8427-2	Permophricodothyris ovata	brachiopod (doubtful)	0.706818	256.76	Lower Julfa, Kuh-e-Ali Bashi		Iran	Dzhulfian	Wuchiapingian	Denison et al., 1994
J B-5	brachiopod	brachiopod	0.707018	256.949	Clarkina leveni, Jolfa		Iran	Dzhulfian	Wuchiapingian	Korte et al., 2006
Aba 24		conodonts	0.707057	257	Clarkina leveni, Abadeh		Iran	Dzhulfian	Wuchiapingian	Korte et al., 2003
KL-7		conodont	0.70709	257.112	Kotla Lodlian	Khisor Range	Pakistan	Wuchiapingian	Wuchiapingian	Martin and Macdougall, 1995
E 1 647		brachiopod	0.706921	257.255	U5 = APP5, Peawaddy		Australia		Wuchiapingian	Morante, 1996
J B-2	brachiopod	brachiopod	0.706978	257.265	Clarkina leveni, Jolfa		Iran	Dzhulfian	Wuchiapingian	Korte et al., 2006
Aba 21		conodont	0.707087	257.4	leveni, Abadeh		Iran		Wuchiapingian	Korte et al., 2004
J B-1	brachiopod	brachiopod (doubtful)	0.706931	257.54	Clarkina leveni, Jolfa		Iran	Dzhulfian	Wuchiapingian	Korte et al., 2006
Aba 19		conodont	0.707046	257.6	leveni, Abadeh		Iran		Wuchiapingian	Korte et al., 2004
KL-6		conodont	0.707088	258.12	Kotla Lodlian	Khisor Range	Pakistan	Wuchiapingian	Wuchiapingian	Martin and Macdougall, 1995
ez 16	brachiopod	brachiopod (doubtful)	0.707337	258.782	Grodziec		Poland	Zechstein 1	Wuchiapingian	Korte et al., 2006
ez 36	brachiopod	brachiopod (doubtful)	0.707213	258.782	Zeche Beeckerwerth	North Rhine-Westphalia	Germany	Zechstein 1	Wuchiapingian	Korte et al., 2006
ez 28	brachiopod	brachiopod (doubtful)	0.70715	258.782	Schuchardt quarry, Cornberg	Hesse	Germany	Zechstein 1	Wuchiapingian	Korte et al., 2006
ez 18	brachiopod	brachiopod (doubtful)	0.707143	258.782	Grodziec		Poland	Zechstein 1	Wuchiapingian	Korte et al., 2006
ez 4	brachiopod	brachiopod (doubtful)	0.707116	258.782	Grodziec		Poland	Zechstein 1	Wuchiapingian	Korte et al., 2006
ez 10	brachiopod	brachiopod (doubtful)	0.707108	258.782	Koscielna, Wegliniec		Poland	Zechstein 1	Wuchiapingian	Korte et al., 2006
ez 9	brachiopod	brachiopod	0.707101	258.782	Zeche Beeckerwerth II	North Rhine-Westphalia	Germany	Zechstein 1	Wuchiapingian	Korte et al., 2006
ez 17	brachiopod	brachiopod (doubtful)	0.707078	258.782	Grodziec	Poland	Poland	Zechstein 1	Wuchiapingian	Korte et al., 2006
ez 32	brachiopod	brachiopod (doubtful)	0.707055	258.782	Schuchardt quarry, Cornberg	Hesse	Germany	Zechstein 1	Wuchiapingian	Korte et al., 2006
ez 19	brachiopod	brachiopod (doubtful)	0.707054	258.782	Gerlach quarry, Rockensüß	Hesse	Germany	Zechstein 1	Wuchiapingian	Korte et al., 2006
ez 3	brachiopod	brachiopod (doubtful)	0.707054	258.782	Gerlach quarry, Rockensüß	Hesse	Germany	Zechstein 1	Wuchiapingian	Korte et al., 2006
ez 33	brachiopod	brachiopod (doubtful)	0.707052	258.782	Schuchardt quarry, Cornberg	Hesse	Germany	Zechstein 1	Wuchiapingian	Korte et al., 2006
ez 30	brachiopod	brachiopod (doubtful)	0.707038	258.782	Schuchardt quarry, Cornberg	Hesse	Germany	Zechstein 1	Wuchiapingian	Korte et al., 2006
ez 6	brachiopod	brachiopod	0.707025	258.782	Iwiny Grube Konrad			Zechstein 1	Wuchiapingian	Korte et al., 2006
ez 25	brachiopod	brachiopod (doubtful)	0.707016	258.782	Schafhof, Eschwege	Hesse	Germany	Zechstein 1	Wuchiapingian	Korte et al., 2006
ez 8	brachiopod	brachiopod	0.707007	258.782	Koscielna, Wegliniec		Poland	Zechstein 1	Wuchiapingian	Korte et al., 2006
ez 2	brachiopod	brachiopod	0.706991	258.782	Büdinger Tunnel, Wetterau	Hesse	Germany	Zechstein 1	Wuchiapingian	Korte et al., 2006
ez 1	brachiopod	brachiopod	0.706982	258.782	Zeche Beeckerwerth II	North Rhine-Westphalia	Germany	Zechstein 1	Wuchiapingian	Korte et al., 2006
KL-4+5		conodont	0.707189	259.128	Kotla Lodlian	Khisor Range	Pakistan	Wuchiapingian	Wuchiapingian	Martin and Macdougall, 1995
7594	anhydrite	evaporite	0.707068	259.56	Rustler Fm.	New Mexico	USA	Ochoan	Wuchiapingian	Denison et al., 1994
7602	anhydrite	evaporite	0.706758	259.64	Salado Fm.	New Mexico	USA	Ochoan	Wuchiapingian	Denison et al., 1994
7858	mudstone	whole rock carbonate	0.706808	259.64	Rustler Fm.	Texas	USA	Ochoan	Wuchiapingian	Denison et al., 1994
2112	gypsum	evaporite	0.707358	259.72	Cloud Chief Fm.	Oklahoma	USA	Ochoan	Wuchiapingian	Denison et al., 1994
1781	gypsum	evaporite	0.706778	259.72	Salado Fm.	Texas	USA	Ochoan	Wuchiapingian	Denison et al., 1994
1782	crystalline calcite	whole rock carbonate	0.706778	259.72	Salado Fm.	Texas	USA	Ochoan	Wuchiapingian	Denison et al., 1994
2103	gypsum	evaporite	0.706808	259.72	Salado Fm.	Texas	USA	Ochoan	Wuchiapingian	Denison et al., 1994
1789	banded gypsum	evaporite	0.706728	259.8	Castile Fm.	New Mexico	USA	Ochoan	Wuchiapingian	Denison et al., 1994
2102	crystalline calcite	whole rock carbonate	0.706868	259.8	Castile Fm.	New Mexico	USA	Ochoan	Wuchiapingian	Denison et al., 1994
7855	gypsum	evaporite	0.706758	259.8	Castile Fm.	Texas	USA	Ochoan	Wuchiapingian	Denison et al., 1994
2111	gypsum	evaporite	0.707098	259.8	Cloud Chief Fm.	Texas	USA	Ochoan	Wuchiapingian	Denison et al., 1994
BM-4		conodont	0.707015	260.012	Bird Mine, Del Norte Mountains	Texas	USA	Capitanian	Capitanian	Martin and Macdougall, 1995
BM-3		conodont	0.707047	260.436	Bird Mine, Del Norte Mountains	Texas	USA	Capitanian	Capitanian	Martin and Macdougall, 1995
GMN 5	brachiopod	brachiopod	0.706865	260.852	Clarkina altudaensis-Clarkina crofti, Reef trail	Guadalupian Mts., Texas	USA	Capitanian	Capitanian	Korte et al., 2006
BM-5		conodont	0.706901	260.86	Bird Mine, Del Norte Mountains	Texas	USA	Capitanian	Capitanian	Martin and Macdougall, 1995
GMN 3	brachiopod	brachiopod	0.706896	260.963	Clarkina altudaensis-Clarkina crofti, Reef trail	Guadalupian Mts., Texas	USA	Capitanian	Capitanian	Korte et al., 2006
E 5 735		brachiopod	0.706451	261.567	bottom U5b= APP5004, top Ingelara		Australia		Capitanian	Morante, 1996
E 5 735		brachiopod	0.706501	261.567	bottom U5b= APP5004, top Ingelara		Australia		Capitanian	Morante, 1996
GM 20B	brachiopod	brachiopod	0.706912	261.691	Mesogondolella shannoni, RC 43.9 mi. from Carlsbad	Guadalupian Mts., Texas	USA	Capitanian	Capitanian	Korte et al., 2006
GM 19B	brachiopod	brachiopod	0.707042	261.732	Mesogondolella shannoni, RC 43.9 mi. from Carlsbad	Guadalupian Mts., Texas	USA	Capitanian	Capitanian	Korte et al., 2006
Aba 11 b		conodonts	0.707179	261.9	Abadeh		Iran	Capitanian	Capitanian	Korte et al., 2003
E 1 692		brachiopod	0.706791	261.92	U5 = APP5, top third Ingelara		Australia		Capitanian	Morante, 1996
E 1 693,8		brachiopod	0.706831	261.92	U5 = APP5, top third Ingelara		Australia		Capitanian	Morante, 1996
E 1 701,8		brachiopod	0.706901	262.156	U5 = APP5, top third Ingelara		Australia		Capitanian	Morante, 1996
E 1 702		brachiopod	0.706871	262.156	U5 = APP5, top third Ingelara		Australia		Capitanian	Morante, 1996
1790	mudstone	whole rock carbonate	0.706848	262.3	Bell Canyon Fm.	Texas	USA	Guadalupian	Capitanian	Denison et al., 1994
7854-1	mudstone	whole rock carbonate	0.706808	262.3	Bell Canyon Fm.	Texas	USA	Guadalupian	Capitanian	Denison et al., 1994
KL-2+3		conodont	0.707156	262.45	Kotla Lodlian	Khisor Range	Pakistan	Capitanian	Capitanian	Martin and Macdougall, 1995
E 1 784		brachiopod	0.706851	263.039	U5a= 5001-2, Freitag equivalent		Australia		Capitanian	Morante, 1996
E 1 793,1		brachiopod	0.706881	263.039	U5a= 5001-2, Freitag equivalent		Australia		Capitanian	Morante, 1996
E 5 833		brachiopod	0.706861	263.039	U5a= 5001-3, Freitag		Australia		Capitanian	Morante, 1996
GMN 9	brachiopod	brachiopod	0.70694	263.264	Mesogondolella postserrata, McCombs (Mckittric Canyon)	Guadalupian Mts., Texas	USA	Capitanian	Capitanian	Korte et al., 2006
GMN 10	brachiopod	brachiopod	0.706852	263.509	Mesogondolella postserrata, McCombs (Mckittric Canyon)	Guadalupian Mts., Texas	USA	Capitanian	Capitanian	Korte et al., 2006
TX-6		conodont	0.706936	263.616	Del Norte Mountains	Texas	USA	Capitanian	Capitanian	Martin and Macdougall, 1995
BM-2		conodont	0.707394	263.616	Bird Mine, Del Norte Mountains	Texas	USA	Capitanian	Capitanian	Martin and Macdougall, 1995
GM 8	brachiopod	brachiopod	0.706862	264.451	Mesogondolella postserrata, RC 46.5 mi. from Carlsbad	Guadalupian Mts., Texas	USA	Capitanian	Capitanian	Korte et al., 2006
UQ L 3543		brachiopod	0.706941	264.511	L5c=APP43, Scottsville Mbr.		Australia		Capitanian	Morante, 1996
TX-5		conodont	0.707019	264.57	Del Norte Mountains	Texas	USA	Capitanian	Capitanian	Martin and Macdougall, 1995
BM-1		conodont	0.707235	264.57	Bird Mine, Del Norte Mountains	Texas	USA	Capitanian	Capitanian	Martin and Macdougall, 1995
1898	gypsum	evaporite	0.706968	264.8	Whitehorse Fm.	Texas	USA	Guadalupian	Capitanian	Denison et al., 1994
4779-3	packstone	whole rock carbonate	0.706998	264.8	Gerster Fm.	Utah	USA	Guadalupian	Capitanian	Denison et al., 1994
4779-5	recrystallized wackestone	whole rock carbonate	0.707018	264.8	Gerster Fm.	Utah	USA	Guadalupian	Capitanian	Denison et al., 1994
GMN 15	brachiopod	brachiopod	0.707039	265.138	Mesogondolella aserrata, Nipple Hill	Guadalupian Mts., Texas	USA	Wordian	Wordian	Korte et al., 2006
GMN 13	brachiopod	brachiopod	0.706986	265.172	Mesogondolella aserrata, Nipple Hill	Guadalupian Mts., Texas	USA	Wordian	Wordian	Korte et al., 2006
BC-9		conodont	0.707051	265.206	Baldwin Creek	Wyoming	USA	Kazanian	Wordian	Martin and Macdougall, 1995
CD-1+2		conodont	0.707118	265.206	Chhidru Nala	Salt Range	Pakistan	Kazanian/Capitanian	Wordian	Martin and Macdougall, 1995
SA-5+6		conodont	0.707105	265.364	Saidu Wadi	Khisor Range	Pakistan	Kazanian	Wordian	Martin and Macdougall, 1995
BC-8		conodont	0.707079	265.893	Baldwin Creek	Wyoming	USA	Kazanian	Wordian	Martin and Macdougall, 1995
SA-3+4		conodont	0.707376	265.946	Saidu Wadi	Khisor Range	Pakistan	Kazanian	Wordian	Martin and Macdougall, 1995
BC-7		conodont	0.707088	266.686	Baldwin Creek	Wyoming	USA	Kazanian	Wordian	Martin and Macdougall, 1995
E 5 864,35		brachiopod	0.706881	266.95	L5c=APP43, top [third] Aldebaran		Australia		Wordian	Morante, 1996
11963	mudstone	whole rock carbonate	0.706998	267.3	San Andres Fm.	New Mexico	USA	Guadalupian	Wordian	Denison et al., 1994
2114	gypsum	evaporite	0.707428	267.3	Blaine Fm.	Oklahoma	USA	Guadalupian	Wordian	Denison et al., 1994
BC-6		conodont	0.707196	267.479	Baldwin Creek	Wyoming	USA	Kazanian	Wordian	Martin and Macdougall, 1995
SA-1+2		conodont	0.707199	267.479	Saidu Wadi	Khisor Range	Pakistan	Kazanian	Wordian	Martin and Macdougall, 1995
KL-1		conodont	0.707178	267.479	Kotla Lodlian	Khisor Range	Pakistan	Kazanian	Wordian	Martin and Macdougall, 1995
TX-3		conodont	0.706902	267.743	Del Norte Mountains	Texas	USA	Kazanian	Wordian	Martin and Macdougall, 1995
TX-2		conodont	0.707217	268.536	Del Norte Mountains	Texas	USA	Kazanian	Wordian	Martin and Macdougall, 1995
ST-6		conodont	0.707319	268.967	Split Tank, Glass Mountains	Texas	USA	Ufimian	Roadian	Martin and Macdougall, 1995
BC-4+5		conodont	0.707121	269.217	Baldwin Creek	Wyoming	USA	Kazanian/Ufimian	Kungurian	Martin and Macdougall, 1995
E 5 972,59		brachiopod	0.707051	269.578	U4 non; L5b=APP42, middle Aldebaran		Australia		Wordian	Morante, 1996
BC 12	brachiopod	brachiopod	0.707103	269.872	Mesogondolella nankingensis, Bone Spring Canyon	Guadalupian Mts., Texas	USA	Roadian	Roadian	Korte et al., 2006
42	Ingerella sp.	brachiopod (doubtful)	0.706919	271	Gerringong Volcanics, Sydney Basin	New South Wales	Australia	Early-Middle Kazanian	Roadian	Veizer and Compston, 1974
43	Spirifer convolutus	brachiopod (doubtful)	0.707219	271	Gerringong Volcanics, Sydney Basin	New South Wales	Australia	Early-Middle Kazanian	Roadian	Veizer and Compston, 1974
UQ L 5129		brachiopod	0.706971	271.717	top U4b= APP33, Fenestella Shale		Australia		Wordian	Morante, 1996
upper Cutoff	brachiopod	brachiopod	0.707065	271.732	Mesogondolella nankingensis	Guadalupian Mts., Texas	USA	Roadian	Roadian	Korte et al., 2006
SC 60	brachiopod	brachiopod	0.707143	271.861	Mesogondolella nankingensis, Stratotype Canyon	Guadalupian Mts., Texas	USA	Roadian	Roadian	Korte et al., 2006
ST-4+5		conodont	0.707376	272.133	Split Tank, Glass Mountains	Texas	USA	Kungurian/Ufimian	Kungurian	Martin and Macdougall, 1995
GM 1	brachiopod	brachiopod	0.707117	272.14	Mesogondolella nankingensis, road cut 60 mi.	Guadalupian Mts., Texas	USA	Roadian	Roadian	Korte et al., 2006
GM 2	brachiopod	brachiopod (doubtful)	0.707297	272.14	Mesogondolella nankingensis, road cut 60 mi.	Guadalupian Mts., Texas	USA	Roadian	Roadian	Korte et al., 2006
7844	mudstone	whole rock carbonate	0.707168	272.3	Bone Springs Ls.	Texas	USA	Leonardian	Kungurian	Denison et al., 1994
7845	mudstone	whole rock carbonate	0.707078	272.3	Bone Springs Ls.	Texas	USA	Leonardian	Kungurian	Denison et al., 1994
7849	mudstone	whole rock carbonate	0.707118	272.3	Bone Springs Ls.	Texas	USA	Leonardian	Kungurian	Denison et al., 1994
7851-1	mudstone	whole rock carbonate	0.707168	272.3	Bone Springs Ls.	Texas	USA	Leonardian	Kungurian	Denison et al., 1994
7851-2	mudstone	whole rock carbonate	0.707208	272.3	Bone Springs Ls.	Texas	USA	Leonardian	Kungurian	Denison et al., 1994
2105	anhydrite	evaporite	0.706968	272.3	Zechstein	North Sea	UK	Ufimian	Kungurian	Denison et al., 1994
BC-3		conodont	0.707361	272.3	Baldwin Creek	Wyoming	USA	Kungurian	Kungurian	Martin and Macdougall, 1995
BC-2		conodont	0.707392	272.838	Baldwin Creek	Wyoming	USA	Kungurian	Kungurian	Martin and Macdougall, 1995
11954	gypsum	evaporite	0.707158	272.906	Glorietta Fm.	New Mexico	USA	Leonardian	Kungurian	Denison et al., 1994
1793	mudstone	whole rock carbonate	0.707298	272.906	Bone Springs Ls.	Texas	USA	Leonardian	Kungurian	Denison et al., 1994
ST-3		conodont	0.707321	273.108	Split Tank, Glass Mountains	Texas	USA	Kungurian	Kungurian	Martin and Macdougall, 1995
T 10 831,25		brachiopod	0.706921	273.3	U4b=APP33, top Cattle Creek Sirius		Australia		Kungurian	Morante, 1996
BC-1		conodont	0.707328	273.377	Baldwin Creek	Wyoming	USA	Kungurian	Kungurian	Martin and Macdougall, 1995
T 10 838,2		brachiopod	0.706991	273.55	U4b=APP33, top Cattle Creek Sirius		Australia		Kungurian	Morante, 1996
SC 30	brachiopod	brachiopod	0.707363	273.626	Stratotype Canyon	Guadalupian Mts., Texas	USA	Kungurian	Kungurian	Korte et al., 2006
ST-2		conodont	0.707329	273.646	Split Tank, Glass Mountains	Texas	USA	Kungurian	Kungurian	Martin and Macdougall, 1995
SC 27	brachiopod	brachiopod	0.707308	273.709	Stratotype Canyon	Guadalupian Mts., Texas	USA	Kungurian	Kungurian	Korte et al., 2006
E 5 1196,84		brachiopod	0.707101	273.8	U4= APP33/32, middle Cattle Creek		Australia		Kungurian	Morante, 1996
T 10 845,25		brachiopod	0.706951	273.8	U4b=APP33, top Cattle Creek Sirius		Australia		Kungurian	Morante, 1996
UQ L 5124		brachiopod	0.707071	273.8	bottom U4b= APP33, Elderslie Fm.		Australia		Kungurian	Morante, 1996
ST-1		conodont	0.707324	274.05	Split Tank, Glass Mountains	Texas	USA	Kungurian	Kungurian	Martin and Macdougall, 1995
T 10 868,8		brachiopod	0.707041	274.3	U4b/U4a=APP33/32, middle Cattle Creek		Australia		Kungurian	Morante, 1996
SR-12		conodont	0.707449	274.454	Skinner Ranch, Glass Mountains	Texas	USA	Kungurian	Kungurian	Martin and Macdougall, 1995
E 5 1210,6		brachiopod	0.707081	274.8	U4= APP33/32, middle Cattle Creek		Australia		Kungurian	Morante, 1996
T 10 884,4		brachiopod	0.707051	274.8	U4b/U4a=APP33/32, middle Cattle Creek		Australia		Kungurian	Morante, 1996
SR-11		conodont	0.707404	274.992	Skinner Ranch, Glass Mountains	Texas	USA	Kungurian	Kungurian	Martin and Macdougall, 1995
E 1 937		brachiopod	0.707091	275.3	U4a= APP32, Cattle Creek		Australia		Kungurian	Morante, 1996
E 1 947		brachiopod	0.707081	275.3	U4a= APP32, Cattle Creek		Australia		Kungurian	Morante, 1996
T 10 897,2		brachiopod	0.707051	275.3	U4a=APP32, middle Cattle Creek		Australia		Kungurian	Morante, 1996
SR-10		conodont	0.707501	275.531	Skinner Ranch, Glass Mountains	Texas	USA	Kungurian	Kungurian	Martin and Macdougall, 1995
sb 8	brachiopod	brachiopod (doubtful)	0.707224	275.8	Reinodden	Svalbard	Norway	Kungurian	Kungurian	Korte et al., 2006
sb 2	brachiopod	brachiopod (doubtful)	0.70716	275.8	Misery mountain	Bjørnøya	Norway	Kungurian	Kungurian	Korte et al., 2006
sb 7	brachiopod	brachiopod (doubtful)	0.707078	275.8	Reinodden	Svalbard	Norway	Kungurian	Kungurian	Korte et al., 2006
sb 9	brachiopod	brachiopod (doubtful)	0.707068	275.8	Reinodden	Svalbard	Norway	Kungurian	Kungurian	Korte et al., 2006
sb 5	brachiopod	brachiopod (doubtful)	0.707059	275.8	Festningen	Svalbard	Norway	Kungurian	Kungurian	Korte et al., 2006
sb 6	brachiopod	brachiopod (doubtful)	0.70705	275.8	Festningen	Svalbard	Norway	Kungurian	Kungurian	Korte et al., 2006
E 5 1219,3		brachiopod	0.707101	275.8	U4= APP33/32, lower third Cattle Creek		Australia		Kungurian	Morante, 1996
T 10 926,8		brachiopod	0.707091	275.8	U4a=APP32, lower third Cattle Creek		Australia		Kungurian	Morante, 1996
SR-9		conodont	0.707494	276.069	Skinner Ranch, Glass Mountains	Texas	USA	Kungurian	Kungurian	Martin and Macdougall, 1995
T 10 952,39		brachiopod	0.707081	276.3	U4a=APP32, bottom Cattle Creek		Australia		Kungurian	Morante, 1996
7465	laminated mudstone	whole rock carbonate	0.707468	276.544	Hess Fm.	Texas	USA	Leonardian	Kungurian	Denison et al., 1994
SR-8		conodont	0.707549	276.608	Skinner Ranch, Glass Mountains	Texas	USA	Kungurian	Kungurian	Martin and Macdougall, 1995
T 10 959,9		brachiopod	0.707121	276.8	U4a=APP32, bottom Cattle Creek		Australia		Kungurian	Morante, 1996
SR-7		conodont	0.707631	277.146	Skinner Ranch, Glass Mountains	Texas	USA	Kungurian	Kungurian	Martin and Macdougall, 1995
2463	packstone	whole rock carbonate	0.707768	277.15	Clear Fork Fm.	Texas	USA	Leonardian	Kungurian	Denison et al., 1994
2464	packstone	whole rock carbonate	0.707978	277.15	Clear Fork Fm.	Texas	USA	Leonardian	Kungurian	Denison et al., 1994
SR-6		conodont	0.707617	277.685	Skinner Ranch, Glass Mountains	Texas	USA	Kungurian	Kungurian	Martin and Macdougall, 1995
2344	packstone	whole rock carbonate	0.707828	277.756	Lueders Fm.	Texas	USA	Leonardian	Kungurian	Denison et al., 1994
2460	packstone	whole rock carbonate	0.707748	277.756	Lueders Fm.	Texas	USA	Leonardian	Kungurian	Denison et al., 1994
2461	packstone	whole rock carbonate	0.707598	277.756	Lueders Fm.	Texas	USA	Leonardian	Kungurian	Denison et al., 1994
2462	grainstone	whole rock carbonate	0.707858	277.756	Lueders Fm.	Texas	USA	Leonardian	Kungurian	Denison et al., 1994
2465	packstone	whole rock carbonate	0.707868	277.756	Lueders Fm.	Texas	USA	Leonardian	Kungurian	Denison et al., 1994
2467	packstone	whole rock carbonate	0.707808	277.756	Lueders Fm.	Texas	USA	Leonardian	Kungurian	Denison et al., 1994
2468	grainstone	whole rock carbonate	0.707738	277.756	Lueders Fm.	Texas	USA	Leonardian	Kungurian	Denison et al., 1994
2469	packstone	whole rock carbonate	0.707978	277.756	Lueders Fm.	Texas	USA	Leonardian	Kungurian	Denison et al., 1994
2470	packstone	whole rock carbonate	0.707938	277.756	Lueders Fm.	Texas	USA	Leonardian	Kungurian	Denison et al., 1994
2471	packstone	whole rock carbonate	0.707968	277.756	Lueders Fm.	Texas	USA	Leonardian	Kungurian	Denison et al., 1994
2472	packstone	whole rock carbonate	0.707838	277.756	Lueders Fm.	Texas	USA	Leonardian	Kungurian	Denison et al., 1994
2473	wackestone	whole rock carbonate	0.708008	277.756	Lueders Fm.	Texas	USA	Leonardian	Kungurian	Denison et al., 1994
2474	packstone	whole rock carbonate	0.707838	277.756	Lueders Fm.	Texas	USA	Leonardian	Kungurian	Denison et al., 1994
7542	wackestone	whole rock carbonate	0.707558	277.756	Lueders Fm.	Texas	USA	Leonardian	Kungurian	Denison et al., 1994
SR-5		conodont	0.707441	278.223	Skinner Ranch, Glass Mountains	Texas	USA	Kungurian	Kungurian	Martin and Macdougall, 1995
7538	wackestone	whole rock carbonate	0.707558	278.363	Grape Creek Fm.	Texas	USA	Leonardian	Kungurian	Denison et al., 1994
SR-4		conodont	0.707593	278.762	Skinner Ranch, Glass Mountains	Texas	USA	Kungurian	Kungurian	Martin and Macdougall, 1995
7536	wackestone	whole rock carbonate	0.707638	278.969	Talpa Fm.	Texas	USA	Leonardian	Kungurian	Denison et al., 1994
SR-3		conodont	0.708333	279.3	Skinner Ranch, Glass Mountains	Texas	USA	Kungurian	Kungurian	Martin and Macdougall, 1995
sb Nor 3	brachiopod	brachiopod	0.707478	279.3	Akseløya, West	Svalbard	Norway	Artinskian-Kungurian	Artinskian	Korte et al., 2006
SR-2		conodont	0.708081	279.567	Skinner Ranch, Glass Mountains	Texas	USA	Artinskian	Artinskian	Martin and Macdougall, 1995
2466	packstone	whole rock carbonate	0.707768	279.575	Talpa Fm.	Texas	USA	Leonardian	Artinskian	Denison et al., 1994
SR-1		conodont	0.707999	279.833	Skinner Ranch, Glass Mountains	Texas	USA	Artinskian	Artinskian	Martin and Macdougall, 1995
1895	packstone	whole rock carbonate	0.708018	280.181	Belle Plains Fm.	Texas	USA	Leonardian	Artinskian	Denison et al., 1994
1896	packstone	whole rock carbonate	0.708048	280.181	Belle Plains Fm.	Texas	USA	Leonardian	Artinskian	Denison et al., 1994
1894	grainstone	whole rock carbonate	0.708118	280.788	Belle Plains Fm.	Texas	USA	Leonardian	Artinskian	Denison et al., 1994
7357	wackestone	whole rock carbonate	0.708038	280.788	Hess Fm.	Texas	USA	Leonardian	Artinskian	Denison et al., 1994
7380	pelletal packstone	whole rock carbonate	0.708048	280.788	Hess Fm.	Texas	USA	Leonardian	Artinskian	Denison et al., 1994
44	Neospirifer sp.	brachiopod (doubtful)	0.707439	281	Tiverton Fm., Homevale	Queensland	Australia	Late Artinskian	Artinskian	Veizer and Compston, 1974
45	Taeniothareus subquadratus	brachiopod (doubtful)	0.707699	281	Tiverton Fm., Homevale	Queensland	Australia	Late Artinskian	Artinskian	Veizer and Compston, 1974
46	Strophalosia sp.	brachiopod (doubtful)	0.707789	281	Tiverton Fm., Homevale	Queensland	Australia	Late Artinskian	Artinskian	Veizer and Compston, 1974
E 5 1316,2		brachiopod	0.707181	281.7	Stage3=APP2, bottom Cattle Creek		Australia		Artinskian	Morante, 1996
2053-2	packstone	whole rock carbonate	0.708328	282	Nolan Fm.	Oklahoma	USA	Wolfcampian	Artinskian	Denison et al., 1994
1904	packstone	whole rock carbonate	0.708158	282	Belle Plains Fm.	Texas	USA	Wolfcampian	Artinskian	Denison et al., 1994
2342	packstone	whole rock carbonate	0.708058	282	Belle Plains Fm.	Texas	USA	Wolfcampian	Artinskian	Denison et al., 1994
ru 6	brachiopod	brachiopod (doubtful)	0.70775	282.66	Shafeerka	Southern Urals	Russia	Artinskian	Artinskian	Korte et al., 2006
7355	wackestone/packstone	whole rock carbonate	0.708168	282.889	Lenox Hills Fm.	Texas	USA	Wolfcampian	Artinskian	Denison et al., 1994
7354	wackestone	whole rock carbonate	0.708248	282.889	Lenox Hills Fm.	Texas	USA	Wolfcampian	Artinskian	Denison et al., 1994
sb 1	brachiopod	brachiopod (doubtful)	0.707854	282.9	Hambergfjellet	Bjørnøya	Norway	Artinskian	Artinskian	Korte et al., 2006
8067	mudstone	whole rock carbonate	0.708038	283.779	Winfield Ls.	Kansas	USA	Wolfcampian	Artinskian	Denison et al., 1994
8068	wackestone	whole rock carbonate	0.708098	283.779	Winfield Ls.	Kansas	USA	Wolfcampian	Artinskian	Denison et al., 1994
sb 10	brachiopod	brachiopod (doubtful)	0.707697	284.7	Reinodden	Svalbard	Norway	Artinskian	Artinskian	Korte et al., 2006
bj HAM 1 16	brachiopod	brachiopod	0.707534	284.7	S. jenkinsi, Hambergfjellet	Bjørnøya	Norway	Artinskian	Artinskian	Korte et al., 2006
sb 4	brachiopod	brachiopod (doubtful)	0.707464	284.7	Festningen	Svalbard	Norway	Artinskian	Artinskian	Korte et al., 2006
47	Spirifer sp.	brachiopod (doubtful)	0.707249	285	Cattle Creek Fm., Springsure	Queensland	Australia	Early-Middle Artinskian	Artinskian	Veizer and Compston, 1974
ru 3	brachiopod	brachiopod	0.707464	285.06	M. bisselli - N. ruzhencevi, Dalnij Tjulkas	Southern Urals	Russia	Artinskian	Artinskian	Korte et al., 2006
ru 2	brachiopod	brachiopod	0.707499	285.54	M. bisselli - N. ruzhencevi, Dalnij Tjulkas	Southern Urals	Russia	Artinskian	Artinskian	Korte et al., 2006
ru 2	brachiopod	brachiopod (doubtful)	0.707482	285.54	M. bisselli - N. ruzhencevi, Dalnij Tjulkas	Southern Urals	Russia	Artinskian	Artinskian	Korte et al., 2006
ru 1	brachiopod	brachiopod	0.707476	285.78	M. bisselli - N. ruzhencevi, Dalnij Tjulkas	Southern Urals	Russia	Artinskian	Artinskian	Korte et al., 2006
8064	mudstone	whole rock carbonate	0.708038	289.116	Barneston Ls.	Kansas	USA	Wolfcampian	Artinskian	Denison et al., 1994
8063	mudstone	whole rock carbonate	0.708018	289.116	Barneston Ls.	Kansas	USA	Wolfcampian	Artinskian	Denison et al., 1994
8065	mudstone	whole rock carbonate	0.707968	289.116	Barneston Ls.	Kansas	USA	Wolfcampian	Artinskian	Denison et al., 1994
8066	mudstone	whole rock carbonate	0.708008	289.116	Barneston Ls.	Kansas	USA	Wolfcampian	Artinskian	Denison et al., 1994
2961	packstone	whole rock carbonate	0.707998	290.005	Wells Fm.	Idaho	USA	Wolfcampian	Artinskian	Denison et al., 1994
sb 12	brachiopod	brachiopod (doubtful)	0.70771	290.1	Tempelet	Svalbard	Norway	Sakmarian-Artinskian	Sakmarian	Korte et al., 2006
sb Nor 4	brachiopod	brachiopod	0.707621	290.1	Gipshuken	Svalbard	Norway	Artinskian	Artinskian	Korte et al., 2006
NV-3		conodont	0.707945	290.185	Garden Valley Fm.	Nevada	USA	Artinskian	Artinskian	Martin and Macdougall, 1995
ru 22	brachiopod	brachiopod	0.707627	291	M. bisselli - M. visibilis - S. primus, Sakmara	Southern Urals	Russia	Sakmarian	Sakmarian	Korte et al., 2006
ru 22	brachiopod	brachiopod (doubtful)	0.70752	291	M. bisselli - M. visibilis - S. primus, Sakmara	Southern Urals	Russia	Sakmarian	Sakmarian	Korte et al., 2006
ru 21	brachiopod	brachiopod (doubtful)	0.707542	291.045	M. bisselli - M. visibilis - S. primus, Sakmara	Southern Urals	Russia	Sakmarian	Sakmarian	Korte et al., 2006
ru 20	brachiopod	brachiopod (doubtful)	0.707589	291.45	M. bisselli - M. visibilis - S. primus, Sakmara	Southern Urals	Russia	Sakmarian	Sakmarian	Korte et al., 2006
ru 20	brachiopod	brachiopod	0.707576	291.45	M. bisselli - M. visibilis - S. primus, Sakmara	Southern Urals	Russia	Sakmarian	Sakmarian	Korte et al., 2006
8055-2	wackestone/mudstone	whole rock carbonate	0.707978	291.784	Wreford Ls.	Kansas	USA	Wolfcampian	Sakmarian	Denison et al., 1994
8057	mudstone	whole rock carbonate	0.707958	291.784	Wreford Ls.	Kansas	USA	Wolfcampian	Sakmarian	Denison et al., 1994
1813	packstone	whole rock carbonate	0.707918	291.784	Hueco Ls.	Texas	USA	Wolfcampian	Sakmarian	Denison et al., 1994
2341	sparry grainstone	whole rock carbonate	0.708658	291.784	Moran Fm.	Texas	USA	Wolfcampian	Sakmarian	Denison et al., 1994
ru 15	brachiopod	brachiopod (doubtful)	0.707694	292.892	M. obliquimarginata - S. merrilli, Usolka	Southern Urals	Russia	Sakmarian	Sakmarian	Korte et al., 2006
ru 13	brachiopod	brachiopod	0.707688	293.302	M. obliquimarginata - S. merrilli, Usolka	Southern Urals	Russia	Sakmarian	Sakmarian	Korte et al., 2006
ru 14	brachiopod	brachiopod	0.707688	293.432	M. obliquimarginata - S. merrilli, Usolka	Southern Urals	Russia	Sakmarian	Sakmarian	Korte et al., 2006
ru 14	brachiopod	brachiopod (doubtful)	0.707651	293.432	M. obliquimarginata - S. merrilli, Usolka	Southern Urals	Russia	Sakmarian	Sakmarian	Korte et al., 2006
2108	gypsum	evaporite	0.707978	294.453	Magdalena Fm.	New Mexico	USA	Wolfcampian	Sakmarian	Denison et al., 1994
ru 12	brachiopod	brachiopod	0.707786	294.461	M. obliquimarginata - S. merrilli, Usolka	Southern Urals	Russia	Sakmarian	Sakmarian	Korte et al., 2006
NV-2		conodont	0.708829	294.862	Garden Valley Fm.	Nevada	USA	Sakmarian	Sakmarian	Martin and Macdougall, 1995
ru 30	brachiopod	brachiopod (doubtful)	0.70782	295.119	M. obliquimarginata - S. merrilli, Usolka	Southern Urals	Russia	Sakmarian	Sakmarian	Korte et al., 2006
ru 11	brachiopod	brachiopod (doubtful)	0.707838	295.187	M. obliquimarginata - S. merrilli, Usolka	Southern Urals	Russia	Sakmarian	Sakmarian	Korte et al., 2006
ru 11	brachiopod	brachiopod	0.707656	295.187	M. obliquimarginata - S. merrilli, Usolka	Southern Urals	Russia	Sakmarian	Sakmarian	Korte et al., 2006
NV-1		conodont	0.708866	296.1	Garden Valley Fm.	Nevada	USA	Asselian	Asselian	Martin and Macdougall, 1995
ru 10	brachiopod	brachiopod (doubtful)	0.707905	296.341	Streptognathodus barskovi, Usolka	Southern Urals	Russia	Asselian	Asselian	Korte et al., 2006
ru 10	brachiopod	brachiopod	0.70791	296.341	Streptognathodus barskovi, Usolka	Southern Urals	Russia	Asselian	Asselian	Korte et al., 2006
ru 29	brachiopod	brachiopod	0.707971	296.415	Streptognathodus barskovi, Usolka	Southern Urals	Russia	Asselian	Asselian	Korte et al., 2006
ru 29	brachiopod	brachiopod (doubtful)	0.707907	296.415	Streptognathodus barskovi, Usolka	Southern Urals	Russia	Asselian	Asselian	Korte et al., 2006
sb 3	brachiopod	brachiopod (doubtful)	0.708165	296.633	Teltvika	Bjørnøya	Norway	Asselian	Asselian	Korte et al., 2006
bj Teltvika	brachiopod	brachiopod	0.708066	296.633	Streptognathodus barskovi, Teltvika	Bjørnøya	Norway	Asselian	Asselian	Korte et al., 2006
sb TG2 110-117	brachiopod	brachiopod (doubtful)	0.70809	296.633	Schwagerina sphaerica, Skansen	Svalbard	Norway	Asselian	Asselian	Korte et al., 2006
12091	packstone	whole rock carbonate	0.707918	297.121	Ferguson Mtn. Fm.	Nevada	USA	Wolfcampian	Asselian	Denison et al., 1994
2055	packstone	whole rock carbonate	0.708408	297.121	Beattie Ls.	Oklahoma	USA	Wolfcampian	Asselian	Denison et al., 1994
2370	recrystallized wackestone	whole rock carbonate	0.708058	297.121	Hueco Ls.	Texas	USA	Wolfcampian	Asselian	Denison et al., 1994
2369	mudstone	whole rock carbonate	0.708418	297.121	Hueco Ls.	Texas	USA	Wolfcampian	Asselian	Denison et al., 1994
sb 11	brachiopod	brachiopod (doubtful)	0.70791	297.2	Skansen	Svalbard	Norway	Asselian	Asselian	Korte et al., 2006
ru 27	brachiopod	brachiopod (doubtful)	0.707986	297.289	Streptognathodus barskovi, Usolka	Southern Urals	Russia	Asselian	Asselian	Korte et al., 2006
ru 26	brachiopod	brachiopod (doubtful)	0.707955	297.44	Streptognathodus barskovi, Usolka	Southern Urals	Russia	Asselian	Asselian	Korte et al., 2006
ru 35	brachiopod	brachiopod (doubtful)	0.707995	297.497	Streptognathodus barskovi, Usolka	Southern Urals	Russia	Asselian	Asselian	Korte et al., 2006
ru 8	brachiopod	brachiopod	0.707982	297.638	Streptognathodus constrictus, Usolka	Southern Urals	Russia	Asselian	Asselian	Korte et al., 2006
ru 25	brachiopod	brachiopod	0.707972	297.803	Streptognathodus constrictus, Usolka	Southern Urals	Russia	Asselian	Asselian	Korte et al., 2006
ru 24	brachiopod	brachiopod (doubtful)	0.708013	297.892	Streptognathodus constrictus, Usolka	Southern Urals	Russia	Asselian	Asselian	Korte et al., 2006
ru 9	brachiopod	brachiopod	0.707992	297.973	Streptognathodus constrictus, Usolka	Southern Urals	Russia	Asselian	Asselian	Korte et al., 2006
12085	wackestone	whole rock carbonate	0.707938	298.011	Ferguson Mtn. Fm.	Nevada	USA	Wolfcampian	Asselian	Denison et al., 1994
12089	wackestone	whole rock carbonate	0.707938	298.011	Ferguson Mtn. Fm.	Nevada	USA	Wolfcampian	Asselian	Denison et al., 1994
2375	pelletal wackestone	whole rock carbonate	0.708318	298.011	Hueco Ls.	Texas	USA	Wolfcampian	Asselian	Denison et al., 1994
KN-1		conodont	0.708099	298.1	Neva Limestone	Kansas	USA	Asselian	Asselian	Martin and Macdougall, 1995
sb TG1 4.8-5.5	brachiopod	brachiopod	0.708174	298.333	Zigarella anderssoni, Skansen	Svalbard	Norway	Asselian	Asselian	Korte et al., 2006
36222	brachiopod	brachiopod	0.70793	298.57	Streptognathodus cristellaris, Junction City (1 mi. SE)	Kansas	USA	Asselian	Asselian	Korte et al., 2006
ru 7	brachiopod	brachiopod	0.708046	298.683	Streptognathodus cristellaris, Usolka	Southern Urals	Russia	Asselian	Asselian	Korte et al., 2006
44403	brachiopod	brachiopod	0.708051	298.793	Streptognathodus invaginatus - S. isolatus, Bearmont (1.75 mi. E)	Kansas	USA	Asselian	Asselian	Korte et al., 2006
8054	wackestone/packstone	whole rock carbonate	0.707938	298.9	Grenola Ls.	Kansas	USA	Wolfcampian	Asselian	Denison et al., 1994
8072-1	packstone	whole rock carbonate	0.707938	298.9	Grenola Ls.	Kansas	USA	Wolfcampian	Asselian	Denison et al., 1994
8072-2	packstone	whole rock carbonate	0.707958	298.9	Grenola Ls.	Kansas	USA	Wolfcampian	Asselian	Denison et al., 1994
12083	mudstone	whole rock carbonate	0.707948	298.9	Ferguson Mtn. Fm.	Nevada	USA	Wolfcampian	Asselian	Denison et al., 1994
12084	wackestone	whole rock carbonate	0.707938	298.9	Ferguson Mtn. Fm.	Nevada	USA	Wolfcampian	Asselian	Denison et al., 1994
2057-2	wackestone	whole rock carbonate	0.708268	298.9	Grenola Ls.	Oklahoma	USA	Wolfcampian	Asselian	Denison et al., 1994
2057-1	wackestone	whole rock carbonate	0.708168	298.9	Grenola Ls.	Oklahoma	USA	Wolfcampian	Asselian	Denison et al., 1994
KN-2		conodont	0.70812	298.9	Neva Limestone	Kansas	USA	Asselian	Asselian	Martin and Macdougall, 1995
2056	wackestone	whole rock carbonate	0.708118	299.967	Red Eagle Ls.	Oklahoma	USA	Virgilian	Gzhelian	Denison et al., 1994
8074-1	wackestone	whole rock carbonate	0.708108	299.967	Red Eagle Ls.	Oklahoma	USA	Virgilian	Gzhelian	Denison et al., 1994
8076-1	wackestone	whole rock carbonate	0.708138	299.967	Red Eagle Ls.	Oklahoma	USA	Virgilian	Gzhelian	Denison et al., 1994
8076-2	wackestone	whole rock carbonate	0.708138	299.967	Red Eagle Ls.	Oklahoma	USA	Virgilian	Gzhelian	Denison et al., 1994
8076-3	wackestone/mudstone	whole rock carbonate	0.708078	299.967	Red Eagle Ls.	Oklahoma	USA	Virgilian	Gzhelian	Denison et al., 1994
8080	wackestone	whole rock carbonate	0.708068	299.967	Red Eagle Ls.	Oklahoma	USA	Virgilian	Gzhelian	Denison et al., 1994
8082-1	wackestone	whole rock carbonate	0.708098	299.967	Red Eagle Ls.	Oklahoma	USA	Virgilian	Gzhelian	Denison et al., 1994
8077	wackestone	whole rock carbonate	0.708058	300.5	Foraker Ls.	Oklahoma	USA	Virgilian	Gzhelian	Denison et al., 1994
8075-1	wackestone	whole rock carbonate	0.708108	300.5	Foraker Ls.	Oklahoma	USA	Virgilian	Gzhelian	Denison et al., 1994
8075-2	packstone	whole rock carbonate	0.708098	300.5	Foraker Ls.	Oklahoma	USA	Virgilian	Gzhelian	Denison et al., 1994
2345	packstone	whole rock carbonate	0.708258	300.5	Gaptank Fm.	Texas	USA	Virgilian	Gzhelian	Denison et al., 1994
1892	packstone	whole rock carbonate	0.708288	300.5	Thrifty Fm.	Texas	USA	Virgilian	Gzhelian	Denison et al., 1994
2372	boundstone	whole rock carbonate	0.709218	301.033	Magdalena Fm.	Texas	USA	Virgilian	Gzhelian	Denison et al., 1994
3423	Wellerella osagensis	brachiopod (doubtful)	0.708318	301.567	Lecompton Ls.	Nebraska	USA	Virgilian	Gzhelian	Denison et al., 1994
2058	wackestone	whole rock carbonate	0.708138	301.567	Lecompton Ls.	Oklahoma	USA	Virgilian	Gzhelian	Denison et al., 1994
8079	mudstone	whole rock carbonate	0.708098	301.567	Lecompton Ls.	Oklahoma	USA	Virgilian	Gzhelian	Denison et al., 1994
1893	boundstone	whole rock carbonate	0.708898	301.567	Graham Fm.	Texas	USA	Virgilian	Gzhelian	Denison et al., 1994
2447	packstone	whole rock carbonate	0.708498	302.1	Home Creek Ls.	Texas	USA	Virgilian	Gzhelian	Denison et al., 1994
12191	wackestone	whole rock carbonate	0.708278	302.1	Home Creek Ls.	Texas	USA	Virgilian	Gzhelian	Denison et al., 1994
12192	wackestone	whole rock carbonate	0.708298	302.1	Home Creek Ls.	Texas	USA	Virgilian	Gzhelian	Denison et al., 1994
